# Supplementary material for: Pre-planted nucleation seeds for rechargeable metallic lithium anodes
Source: Royal Society of Chemistry journal article supplement (doi:10.1039/c7ta04932c), 2017-01-01
Supplement: c7ta04932c1.pdf [file c7ta04932c1.pdf]

Electronic Supplementary Material (ESI) for Journal of Materials Chemistry A.

## Supporting Information

### **Pre-Planted Nucleation Seeds for Rechargeable Metallic Lithium Anode**

Y. Liu, Dr. B. Li, Prof. J. H. Liu, Prof. S. M. Li\*, Prof. S. B. Yang\*

Key Laboratory of Aerospace Advanced Materials and Performance of Ministry of Education,  
School of Materials Science & Engineering

Beihang University

Beijing, 100191, China

E-mail: li\_bin@buaa.edu.cn; songmei\_li@buaa.edu.cn

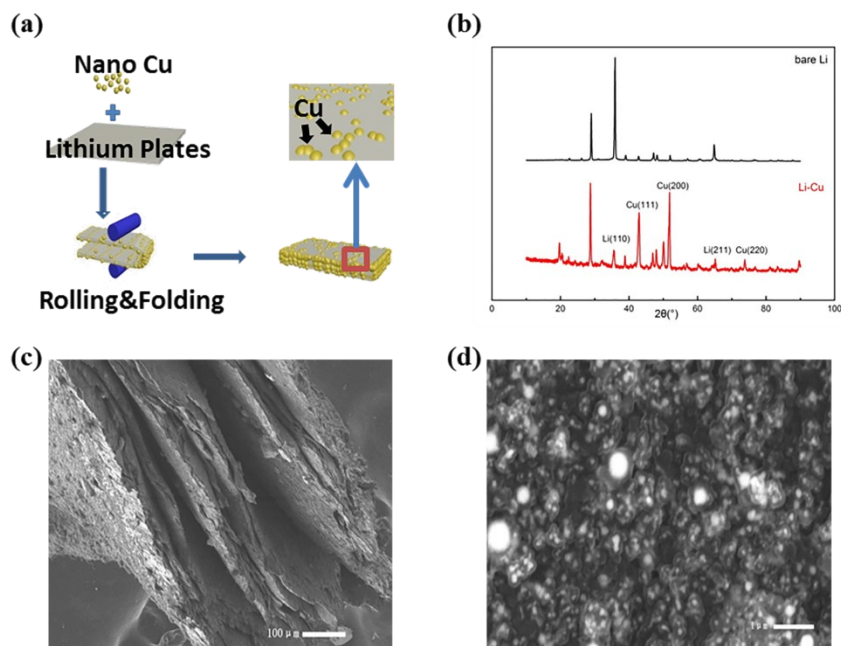

Fig.S1. (a) The synthesis schematic of Li-Cu hybrids mainly consists of rolling&folding. (b) XRD spectrum of Li-Cu hybrids and bare Li (c) Sectional view of Li-Cu hybrids exhibited a typical lamellar structure. (d) Top view of Li-Cu hybrids showed that numerous copper nanoparticles distributed on lithium.

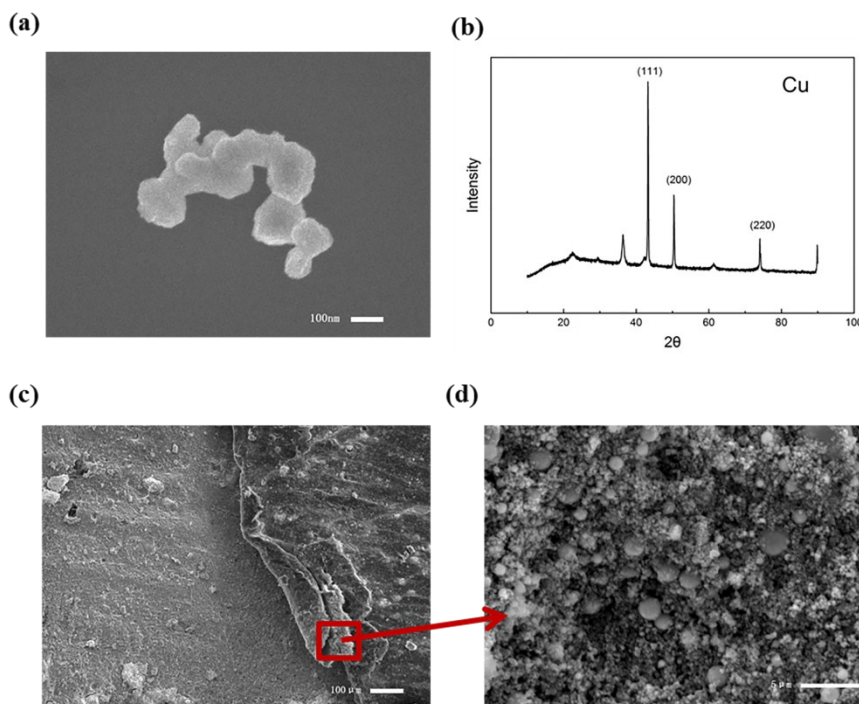

Fig.S2. SEM picture and XRD spectrum of Cu nanoparticles were respectively shown in (a) and (b).SEM of Li-Cu hybrids at the place where some sheets rolled up (c-d) revealed that Cu nanoparticles were distributed in the lamellar structure of the hybrids.

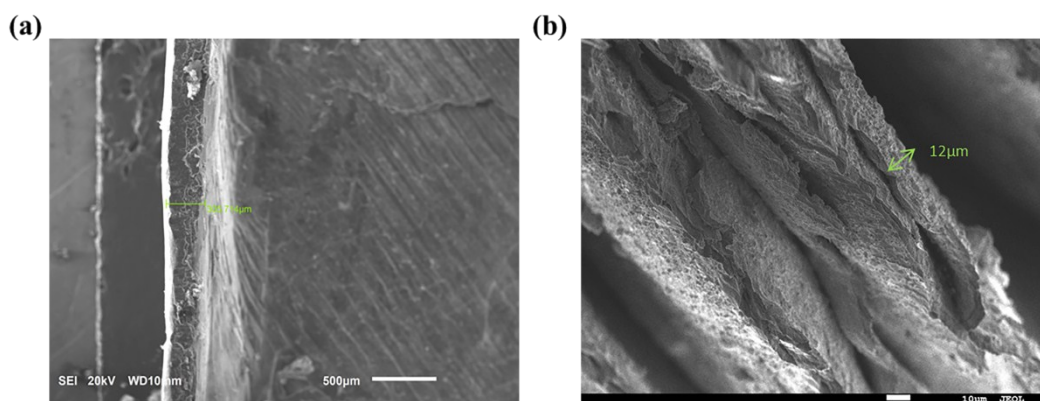

Fig.S3. SEM images of the sectional morphology of Li-Cu hybrid demonstrated that the thickness of the hybrid is about 300microns, and the internal layer thickness is about dozens of microns.

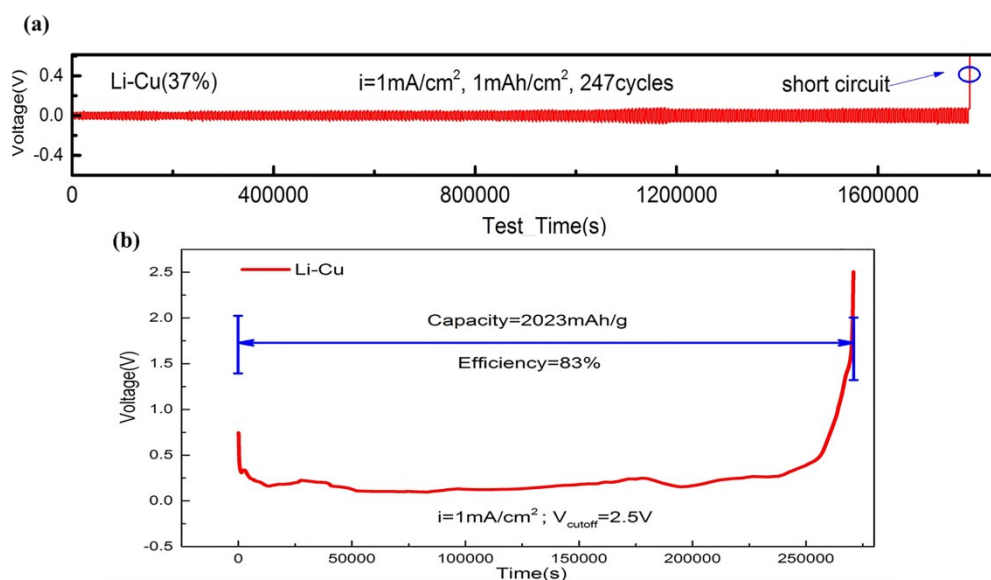

Fig. S4. (a)The complete voltage profile until Li-Cu(37%) cell make a short circuit revealed that Li-Cu (37%) can maintain stable cycling for more than 480h. (b) Typical discharge profile of Li-Cu(37%) hybrids revealed a specific capacity of 2023mAh g<sup>-1</sup>

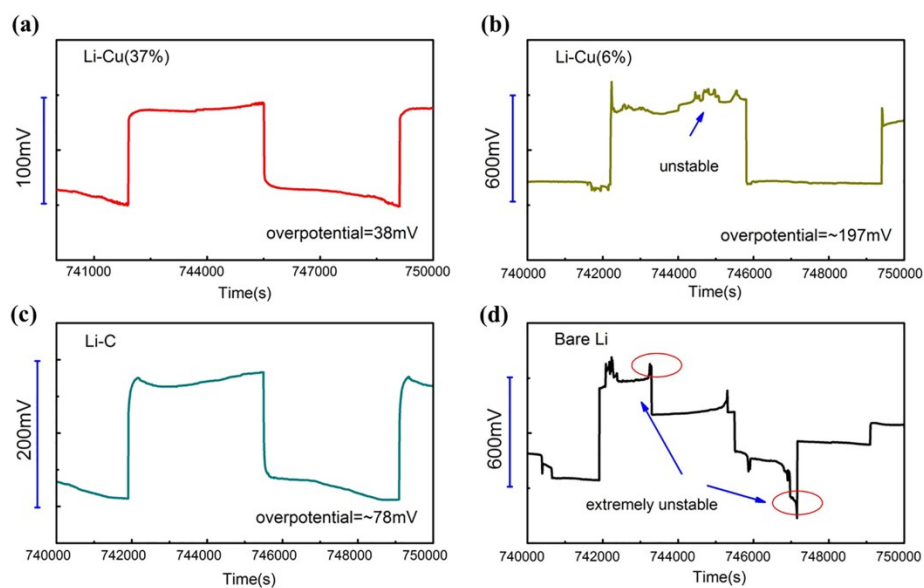

Fig. S5. The magnified voltage profile at 104th cycle for (a) Li-Cu(37%), (b) Li-Cu(6%), (c) Li-C and (d) bare Li.

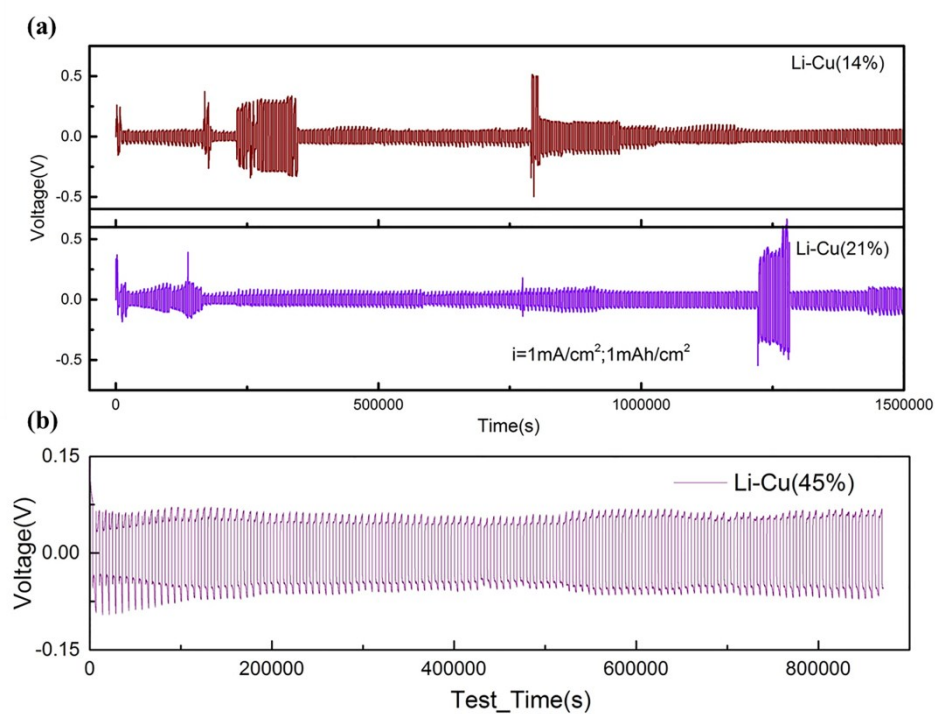

Fig. S6. Electrochemical performance of Li-Cu hybrids with (a) lower Cu content and (b) higher lower Cu content indicated that the stability of Li-Cu hybrids increased with the percentage of Cu.

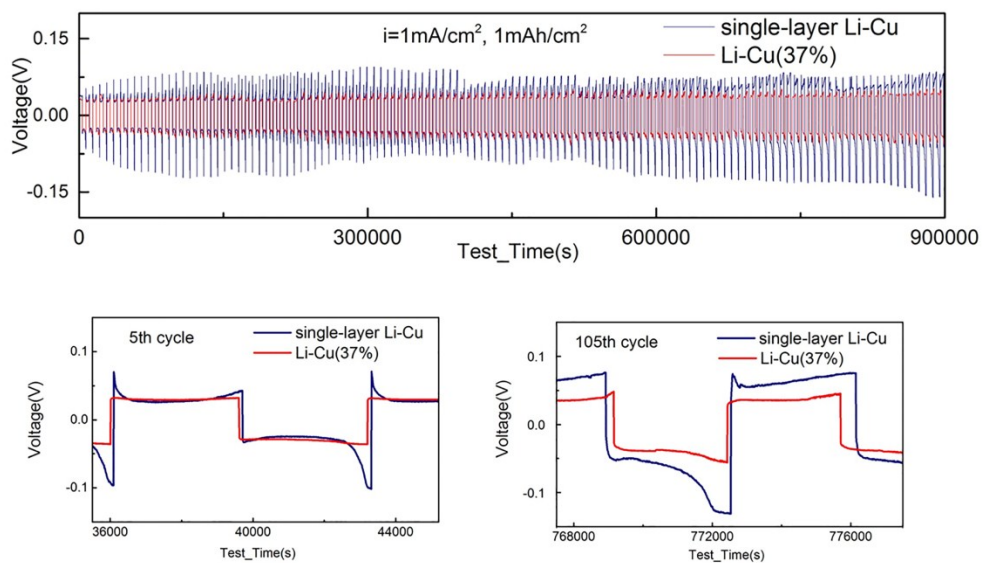

Fig.S7. (a) Electrochemical performance of single-layer Li-Cu hybrid. Magnified voltage profile at the (b) 5th cycle and (c) 105th cycle revealed the superior stability of multi-layer Li-Cu hybrid.

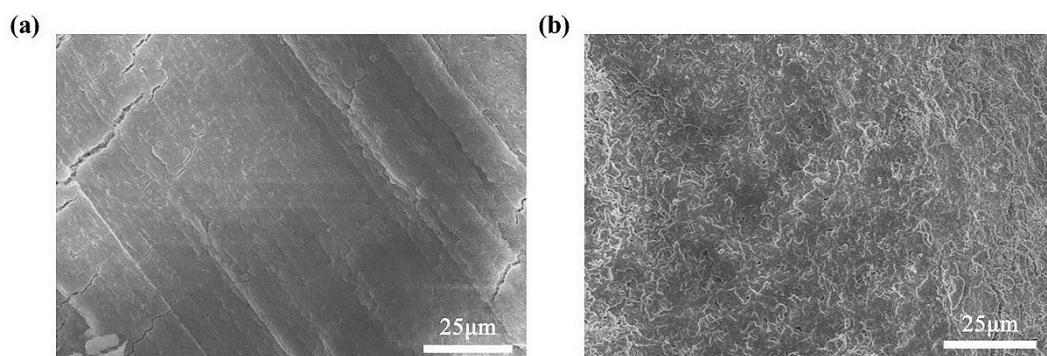

Fig.S8. SEM images of single-layer Li-Cu hybrid after cycling for (a) 50 and (b) 200 cycles under a current density of 1mA/cm<sup>2</sup> and a capacity of 1mAh/cm<sup>2</sup>.



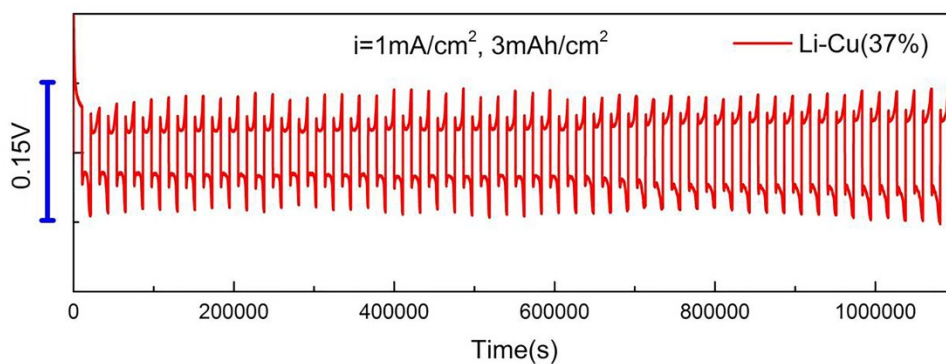

Fig.S9. Electrochemical performance of Li-Cu hybrid under a higher capacity of 3mAh/cm<sup>2</sup>.

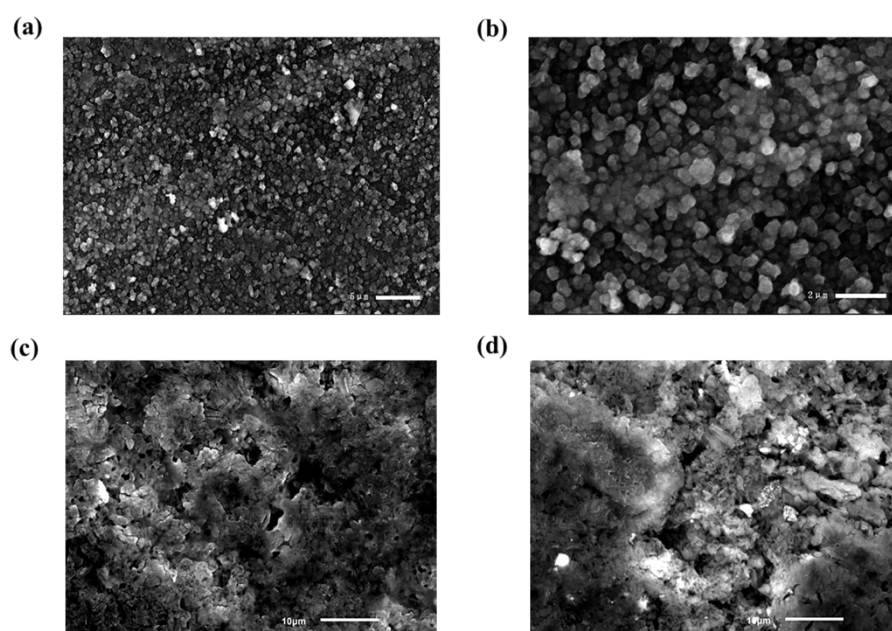

Fig.S10. High magnification SEM images after 30 cycles for (a)(b) Li-Cu hybrid and (c)(d) bare Li electrodes displayed totally different morphology. The granular-like deposition of Li in Li-Cu electrode indicated that Cu nanoparticles had significant influence on the nucleation behavior

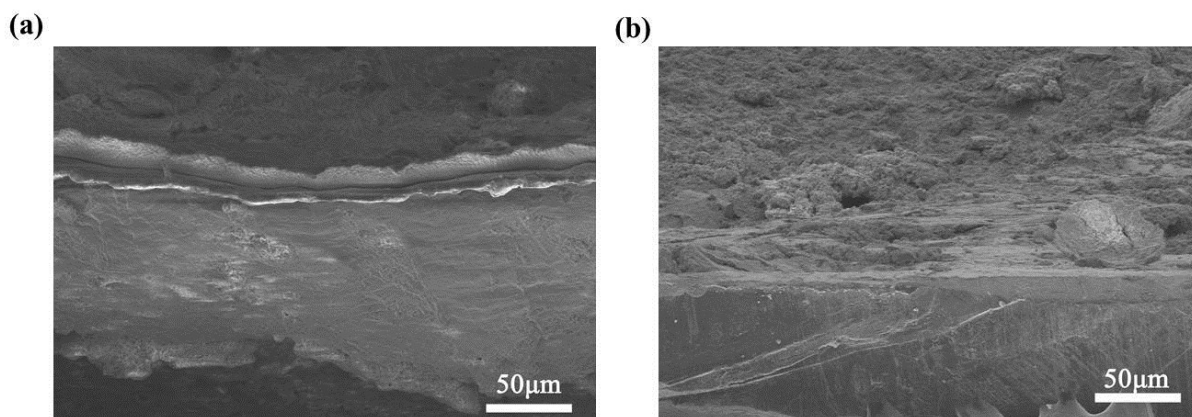

Fig.S11. High magnification SEM images of cross-sectional morphology after 200 cycles for (a) Li-Cu hybrid and (b) bare Li electrodes.

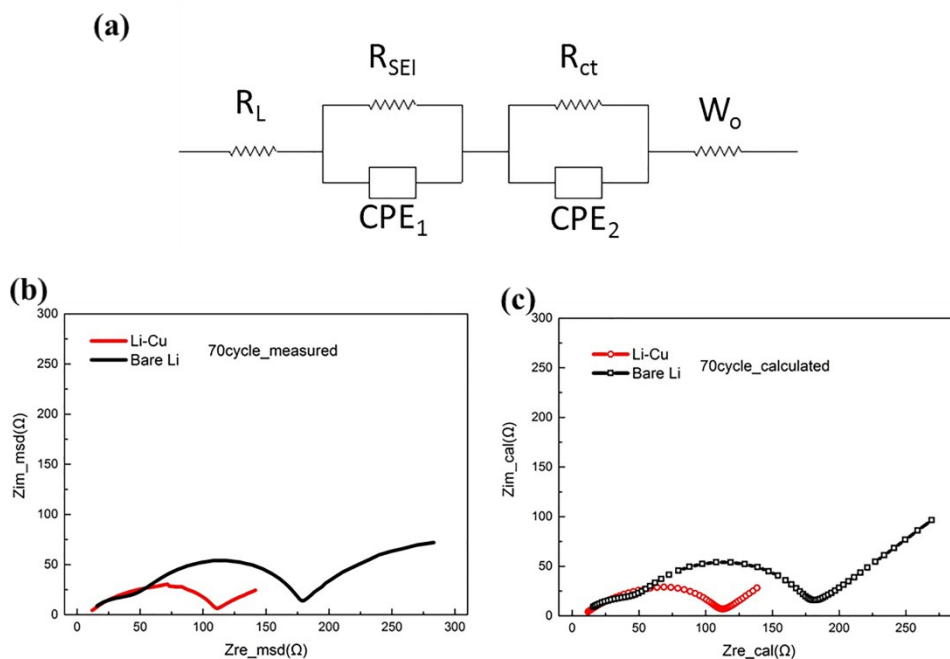

Fig.S12. Test results and analysis of EIS (a) Equivalent circuit used for calculation included three kinds of resistances:  $R_L$ ,  $R_{SEI}$  and  $R_{ct}$ . Nyquist plots (b) measured and (c) calculated of Li-Cu hybrids and bare Li symmetric cells after 70 cycles indicated a lower resistance of the Li-Cu hybrids anode.

|         | $R_L$<br>[ $\Omega$ ] | $R_{SEI}$<br>[ $\Omega$ ] | $R_{ct}$<br>[ $\Omega$ ] |
|---------|-----------------------|---------------------------|--------------------------|
| Li-Cu   | 8.233                 | 36.59                     | 65.92                    |
| Bare Li | 8.283                 | 46.15                     | 118.6                    |

Table S1. calculation results for EIS
